# Supplementary material for: Comparison of the clinical features, viral shedding and immune response in vaccine breakthrough infection by the Omicron and Delta variants
Source: Research Square preprint supplement (doi:10.21203/rs.3.rs-1281925/v1), 2022-01-27
Supplement: Supplementary file 2 [file 7a0e45ebde8beef16e5f4c4e.docx]

**Extended Data Appendix 1**

Analytes covered by the kit included granulocyte-macrophage colony-stimulating factor (GM-CSF), epidermal growth factor (EGF), brain-derived neurotrophic factor, beta-nerve growth factor (bNGF), basic fibroblast growth factor (FGF-2), hepatocyte growth factor (HGF), monocyte chemoattractant protein (MCP) 1, macrophage inflammatory protein (MIP) 1α, MIP-1β, RANTES (regulated on activation, normal T cell expressed and secreted), chemokine (C-X-C motif) ligand (CXCL) 1 (GRO-α), stromal cell-derived factor 1 (SDF-1α), interferon (IFN) gamma-induced protein 10 (IP-10), eotaxin, IFN-α, IFN-γ, interleukin (IL) IL-1α, IL-1β, IL-1RA, IL-2, IL-4, IL-5, IL-6, IL-7, IL-8, IL-9, IL-10, IL-12p70, IL-13, IL-15, IL-17A, IL-18, IL-21, IL-22, IL-23, IL-27, IL-31, leukemia inhibitory factor (LIF), stem cell factor (SCF), tumor necrosis factor (TNF-α), TNF-β, vascular endothelial growth factors A and D (VEGF-A, VEGF-D), platelet derived growth factor (PDGF-BB), and placental growth factor (PLGF-1).

**Extended Data Table 1: Flow cytometry antibodies for whole blood immunophenotyping**

| **No.** | **Marker** | **Colour** | **Volume (**μ**L)** | 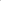**Clone** | 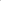**Cat. No.** | 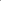**Vendor** |
| --- | --- | --- | --- | --- | --- | --- |
| 1 | CD45 | BUV805 | 0.5 | H130 | 612891 | BD Biosciences |
| 2 | HLADR | AF700 | 0.5 | L243 | 307626 | Biolegend |
| 3 | CD14 | APC CY7 | 0.25 | M0P9 | 557831 | BD Biosciences |
| 4 | CD8 | BV605 | 0.25 | SK1 | 564116 | BD Biosciences |
| 5 | CD16 | PE/Fire™ 640 | 0.125 | 3G8 | 302068 | Biolegend |
| 6 | CD3 | SB550 | 0.25 | SK7 | 344852 | Biolegend |
| 7 | CD19 | BV605 | 0.25 | HIB19 | 740394 | BD Biosciences |
| 8 | VD2 | BV711 | 0.25 | B6 | 331412 | Biolegend |
| 9 | IgD | PerCP 710 | 1.25 | IA6-2 | 46-9868-42 | Thermo Fisher |
| 10 | CD4 | SN685 | 0.25 | SK3 | 344658 | Biolegend |
| 11 | CD27 | PB | 0.25 | O323 | 302822 | Biolegend |
| 12 | CD45RA | BV510 | 0.25 | HI100 | 563031 | BD Biosciences |
| 13 | CD56 | PE CY5.5 | 0.5 | NCAM16.2 | 35-0567-42 | Thermo Fisher |
| 14 | CD38 | PE-CY5 | 1.25 | HIT2 | 555461 | BD Biosciences |
| 15 | CD169 | PERCP5.5 | 1.25 | 7-239 | 346020 | Biolegend |
| 16 | CD69 | BV786 | 0.5 | FN50 | 563834 | BD Biosciences |
| 17 | CD36 | BUV615 | 0.5 | CLB-IVC7 | 751412 | BD Biosciences |
| 18 | CD64 | PE | 1.25 | 10.1 | 305008 | Biolegend |
| 19 | CD11b | BV570 | 0.25 | M1/70 | 101233 | Biolegend |
| 20 | CD21 | SB436 | 0.5 | HB5 | 62-0219-42 | Thermo Fisher |
| 21 | CXCR3 | BV480 | 0.5 | 1C6 | 746283 | BD Biosciences |
| 22 | CD127 | BV650 | 0.5 | HIL-7R-M21 | 563225 | BD Biosciences |
| 23 | IgM | BV711 | 0.5 | MHM-88 | 314540 | Biolegend |
| 24 | IgG | BV750 | 0.5 | G18-145 | 746959 | BD Biosciences |
| 25 | CCR6 | BB515 | 0.5 | 11A9 | 564479 | BD Biosciences |
| 26 | CRTH2 | AF 647 | 0.5 | BM16 | 558042 | BD Biosciences |
| 27 | VD1 | APC Vio770 | 0.25 | REA173 | 130-120-578 | Miltenyi Biotec |
| 28 | CXCR5 | PE/Dazzle™ 594 | 0.25 | J252D4 | 356928 | Biolegend |
| 29 | CD25 | PECy7 | 0.5 | M-A251 | 557741 | BD Biosciences |
| 30 | CD10 | FITC | 1.25 | HI10a | 312208 | BD Biosciences |
| 31 | CD66B | BV421 | 0.5 | G10F5 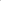 | 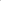562940 | BD Biosciences |

**Extended Data Table 2: Flow cytometry antibodies for SARS-CoV-2-specific T cells by Intracellular Cytokine Staining (ICS)**

| **No.** | **Marker** | **Colour** | **Volume (**μ**L)** | 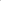**Clone** | 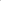**Cat. No.** | 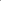**Vendor** |
| --- | --- | --- | --- | --- | --- | --- |
| 1 | CD66B | BV421 | 2 | G10F5 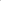 | 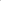562940 | BD Biosciences |
| 2 | CD45RA | SB436 | 2 | H100 | 62-0458-42 | Thermo Fisher |
| 3 | CD27 | PB | 1 | O323 | 302822 | Biolegend |
| 4 | NKG2C | BV480 | 2 | 134591 | 748168 | BD Biosciences |
| 5 | CD8 | BV605 | 1 | SK1 | 564116 | BD Biosciences |
| 6 | CD19 | BV605 | 1 | HIB19 | 740394 | BD Biosciences |
| 7 | VD2 | BV711 | 1 | B6 | 331412 | Biolegend |
| 8 | CD107A | BV786 | 2 | H4A3 | 563869 | BD Biosciences |
| 9 | NKP46 | BB515 | 2 | 9-e2 | 564536 | BD Biosciences |
| 10 | CD3 | SB550 | 1 | SK7 | 344852 | Biolegend |
| 11 | CD169 | PERCP5.5 | 5 | 7-239 | 346020 | Biolegend |
| 12 | HLADR | AF700 | 2 | L243 | 307626 | Biolegend |
| 13 | CD4 | SN685 | 1 | SK3 | 344658 | Biolegend |
| 14 | CD14 | APC CY7 | 1 | M0P9 | 557831 | BD Biosciences |
| 15 | VD1 | APC Vio770 | 1 | REA173 | 130-120-578 | Miltenyi Biotec |
| 16 | L/D | ZOMBIE NIR | 0.5 |  | 423105 | Biolegend |
| 17 | CXCR5 | PE/Dazzle™ 594 | 1 | J252D4 | 356928 | Biolegend |
| 18 | CD154 | PE CY5 | 5 | TRAP-1 | 555701 | BD Biosciences |
| 19 | CD56 | PE CY5.5 | 2 | NCAM16.2 | 35-0567-42 | Thermo Fisher |
| 20 | CD16 | PE/Fire™ 640 | 0.5 | 3G8 | 302068 | Biolegend |
| 21 | CD45 | BUV805 | 2 | H130 | 612891 | BD Biosciences |
| 22 | Granzyme B | BV510 | 2.5 | GB11 | 563388 | BD Biosciences |
| 23 | IFN-y | BV570 | 2.5 | 4S.B3 | 502534 | Biolegend |
| 24 | IL-2 | BV650 | 5 | MQ1-17H12 | 564166 | BD Biosciences |
| 25 | TNF-a | BV750 | 2.5 | MAB11 | 566359 | BD Biosciences |
| 26 | IL-6 | FITC | 2.5 | MQ2-13A5 | 11-7069-82 | Thermo Fisher |
| 27 | IL-17a | AF647 | 10 | N49-653 | 560490 | BD Biosciences |
| 28 | IL-10 | PE | 2.5 | JES-9D7 | 501404 | Biolegend |
| 29 | IL-4 | PECY7 | 2.5 | 8D4-8 | 560672 | BD Biosciences |

**Extended Data Table 3: Team authors for PROTECT Cohort Study Group**

| **Name** | **Highest Degree** | **Affiliation / Institution** |
| --- | --- | --- |
| Yi-Hao Chan | PhD | A*STAR Infectious Diseases Labs, Agency for Science, Technology and Research |
| Guillaume Carissimo | PhD | A*STAR Infectious Diseases Labs, Agency for Science, Technology and Research |
| Adeline C.Y. Chua | PhD | A*STAR Infectious Diseases Labs, Agency for Science, Technology and Research |
| Samantha Y. T. Nguee | PhD | A*STAR Infectious Diseases Labs, Agency for Science, Technology and Research |
| Anthony Torres-Ruesta | BSc | A*STAR Infectious Diseases Labs, Agency for Science, Technology and Research |
| Siti Naqiah Amrun | BSc | A*STAR Infectious Diseases Labs, Agency for Science, Technology and Research |
| Nicholas Kim-Wah Yeo | BSc | A*STAR Infectious Diseases Labs, Agency for Science, Technology and Research |
| Vanessa Kexin Neo | BSc | A*STAR Infectious Diseases Labs, Agency for Science, Technology and Research |
| Wendy Yehui Chen | MSc | A*STAR Infectious Diseases Labs, Agency for Science, Technology and Research |
| Isaac Kai Jie Kam | BSc | A*STAR Infectious Diseases Labs, Agency for Science, Technology and Research |
| Estelle Yi Wei Goh | BSc | A*STAR Infectious Diseases Labs, Agency for Science, Technology and Research |
| Alice Soh Meoy Ong | BSc | A*STAR Infectious Diseases Labs, Agency for Science, Technology and Research |
| Yuling Huang | BSc | A*STAR Infectious Diseases Labs, Agency for Science, Technology and Research |
| Pei Xiang Hor | BSc | A*STAR Infectious Diseases Labs, Agency for Science, Technology and Research |
| Chiew Yee Loh | BSc | A*STAR Infectious Diseases Labs, Agency for Science, Technology and Research |
| Yong Jie Tan | BSc | A*STAR Infectious Diseases Labs, Agency for Science, Technology and Research |
| Joel Xu En Wong | BSc | A*STAR Infectious Diseases Labs, Agency for Science, Technology and Research |
